# Supplementary material for: A Predominant Clonal Thromboembolic Meningoencephalitis Group of Histophilus somni Assigned by Major Outer Membrane Protein Gene Sequencing and Pulsed-Field Gel Electrophoresis
Source: Front Vet Sci. 2018 Sep 19;5:221. doi: 10.3389/fvets.2018.00221 (PMC6156380; doi:10.3389/fvets.2018.00221)
Supplement: Supplementary file 6 [file Table_6.XLSX]

## Sheet: Table S6
Supplementary Table S6.
A matrix table and the results of chi-square test to identify associations between the isolates of PFGE cluster HS1 and TEME.
		TEME	Non TEME	Total
PFGE cluster	HS1	45	25	70
	Non HS1	6	86	92
Total		51	111	162
Chi squared equals 61.4925 with 1 degrees of freedom. The two-tailed P value is less than 0.0001.
